# Supplementary material for: Integration of Transcriptomic and Proteomic Analyses Reveals New Insights into the Regulation of Immune Pathways in Midgut of Samia ricini upon SariNPV Infection
Source: MDPI journal article supplement (doi:10.3390/insects13030294), 2022-03-16
Supplement: s1 [file s1]

## Supplementary Materials

**Figure S1:** Volcano map of the DEGs

**Figure S2:** Scatter plot of GO enrichment analysis

**Figure S3:** Repeatable CV analysis

**Figure S4:** PCA analysis

**Figure S5:** Volcano map of the DEPs

**Figure S6:** Scatter plot of DEPs' KEGG pathway analysis

**Table S1:** 10 Primer sequences of DEGs for qRT-PCR verification

**Table S2:** 7 Primer sequences of DEGs for qRT-PCR verification

**Table S3:** Transcriptome and proteome GO enrichment DEGs/DEPs statistics table.

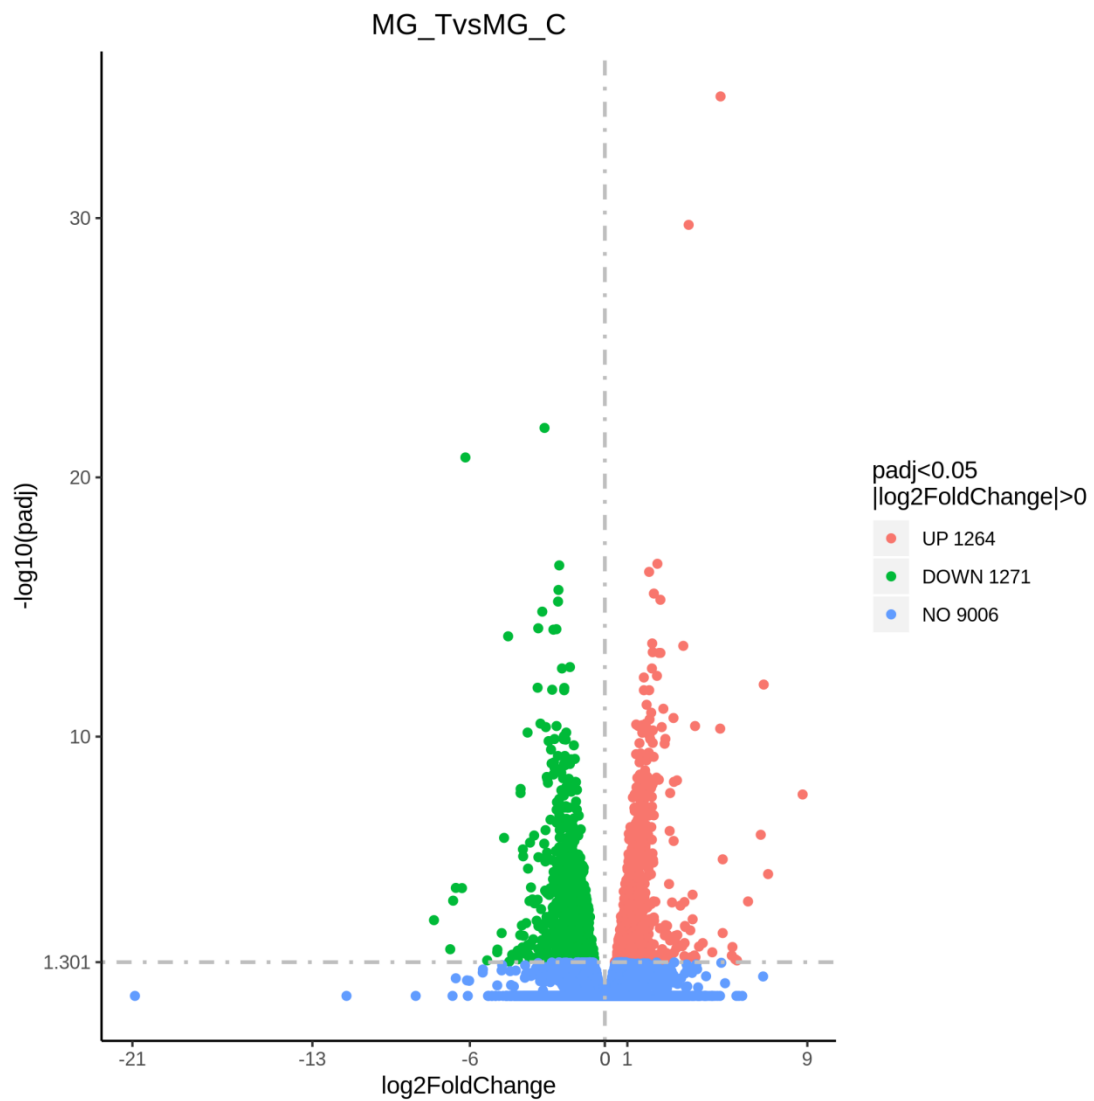

**Figure S1.** Volcano map of the DEGs

Note: The abscissa represents the fold change of gene expression in different experimental groups, and the ordinate represents the statistical significance of gene expression changes. Each point in the figure represents each gene, and the red and green points represent genes that are significantly up-regulated and down-regulated.

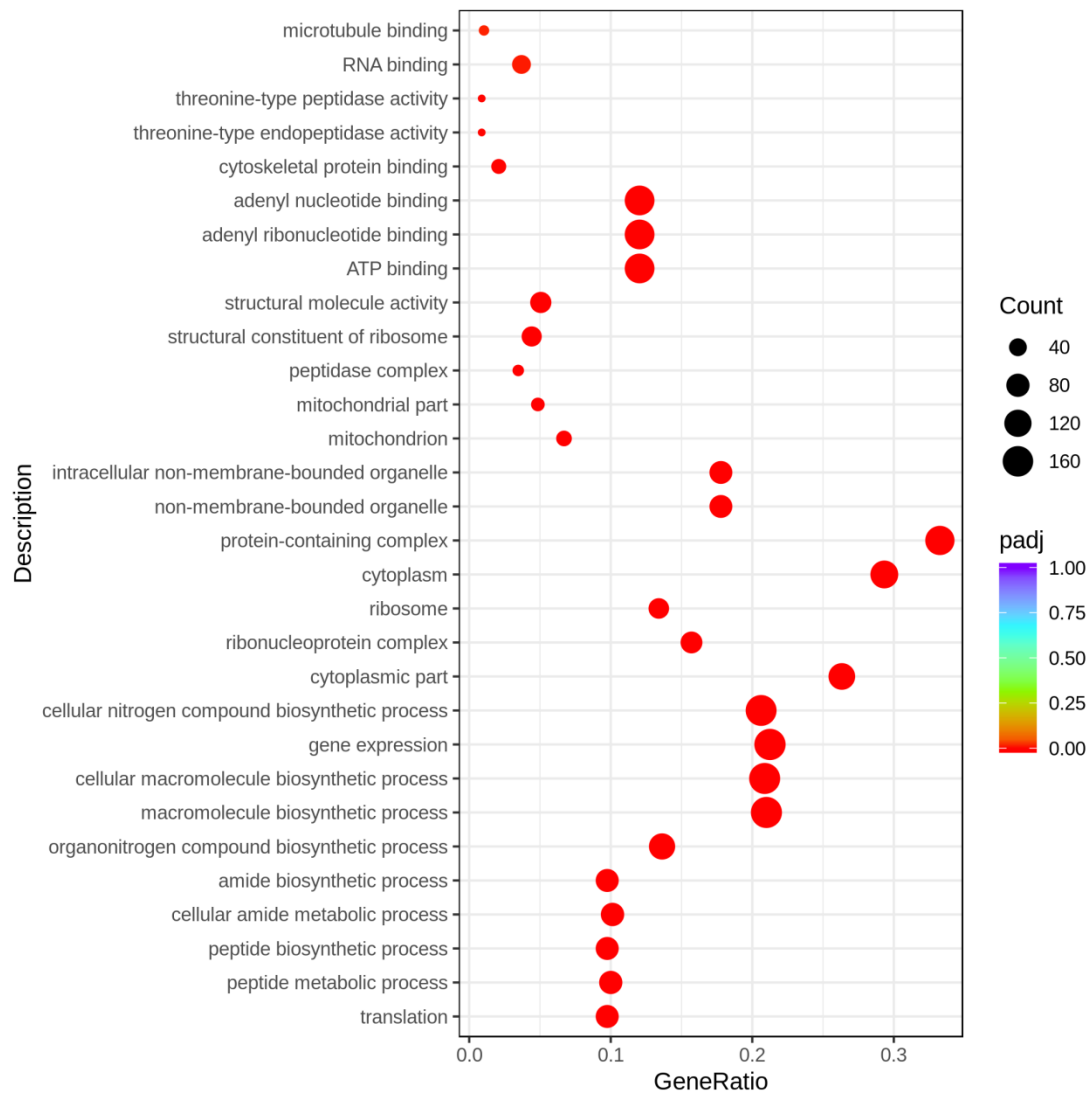

**Figure S2.** Scatter plot of GO enrichment analysis

Note: The abscissa in the figure is the ratio of the number of differential genes annotated to the GO term to the total number of differential genes, the ordinate is the GO term, the size of the scatter points represents the number of genes annotated to the GO term, and the color from red to purple represents rich the saliency size of the set.

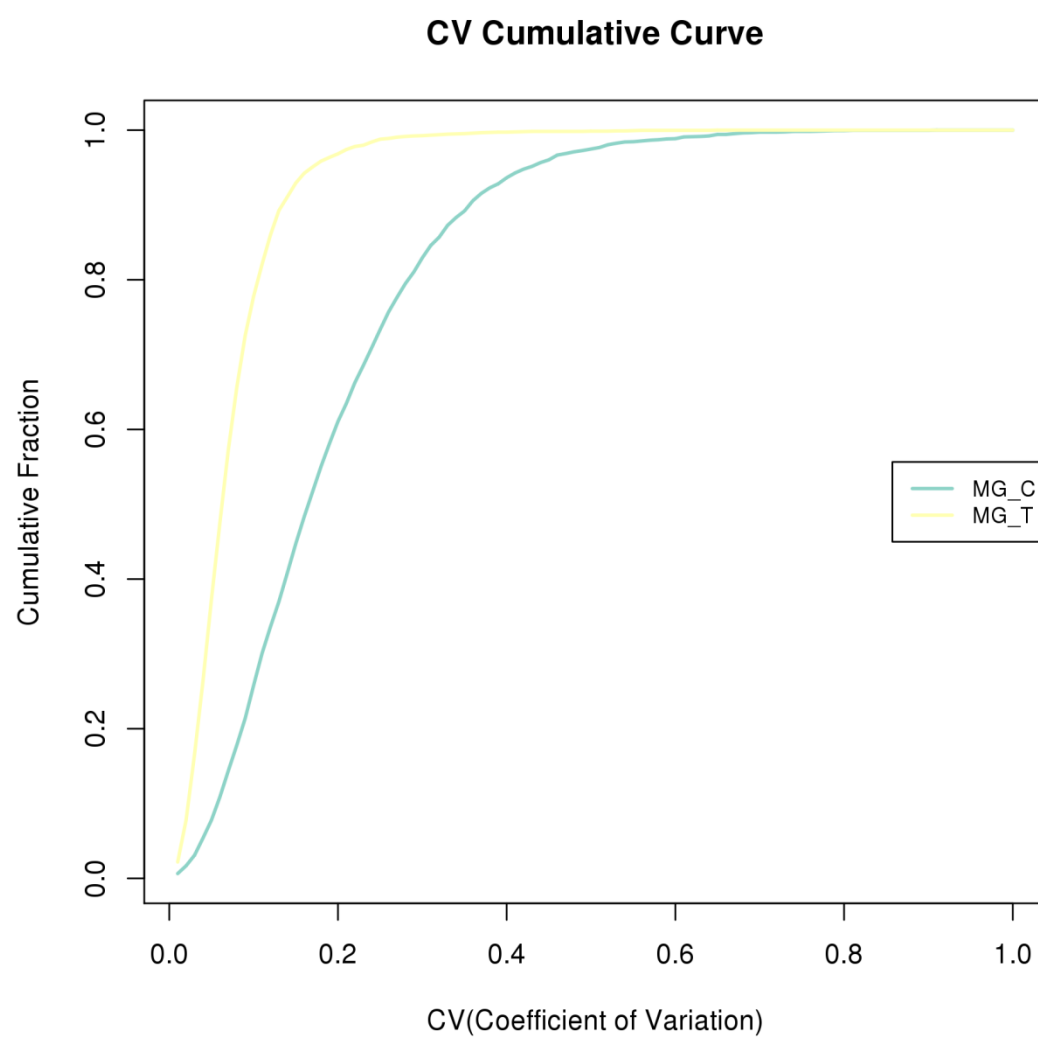

**Figure S3.** Repeatable CV analysis

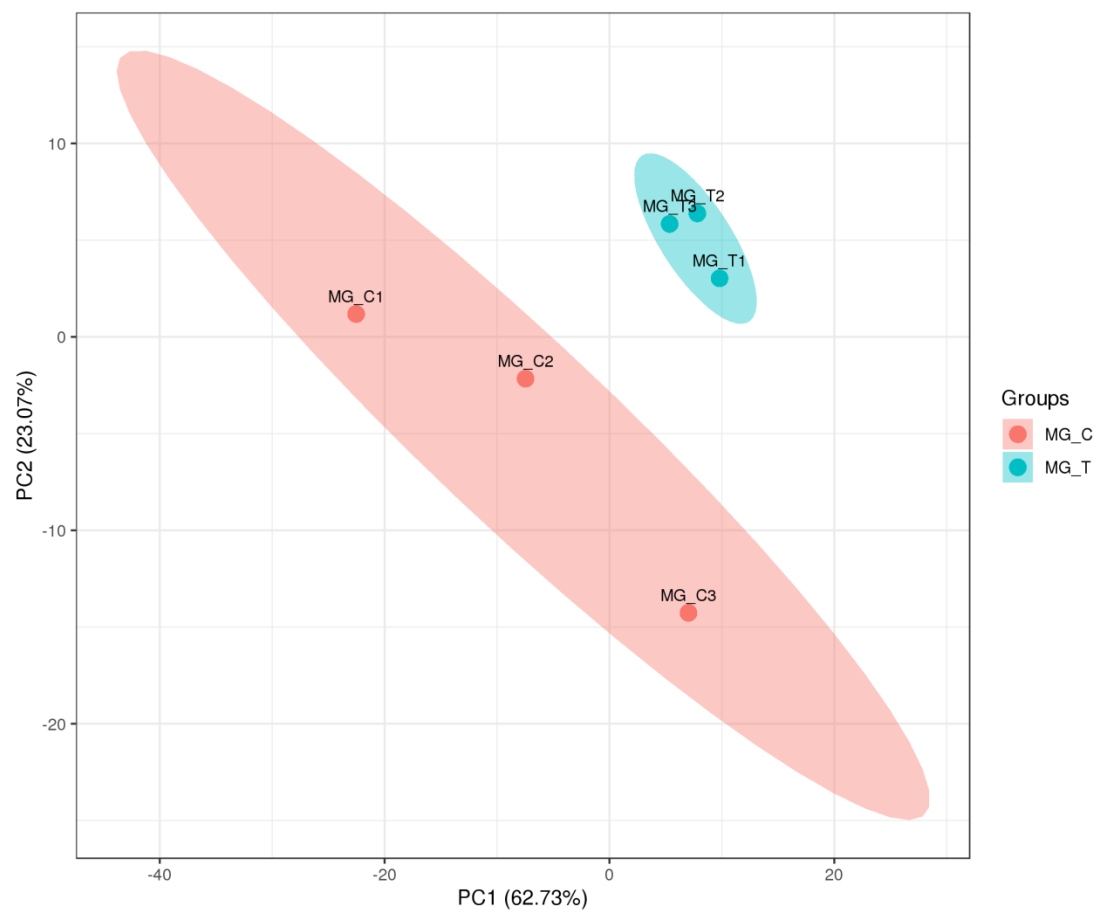

**Figure S4.** PCA analysis

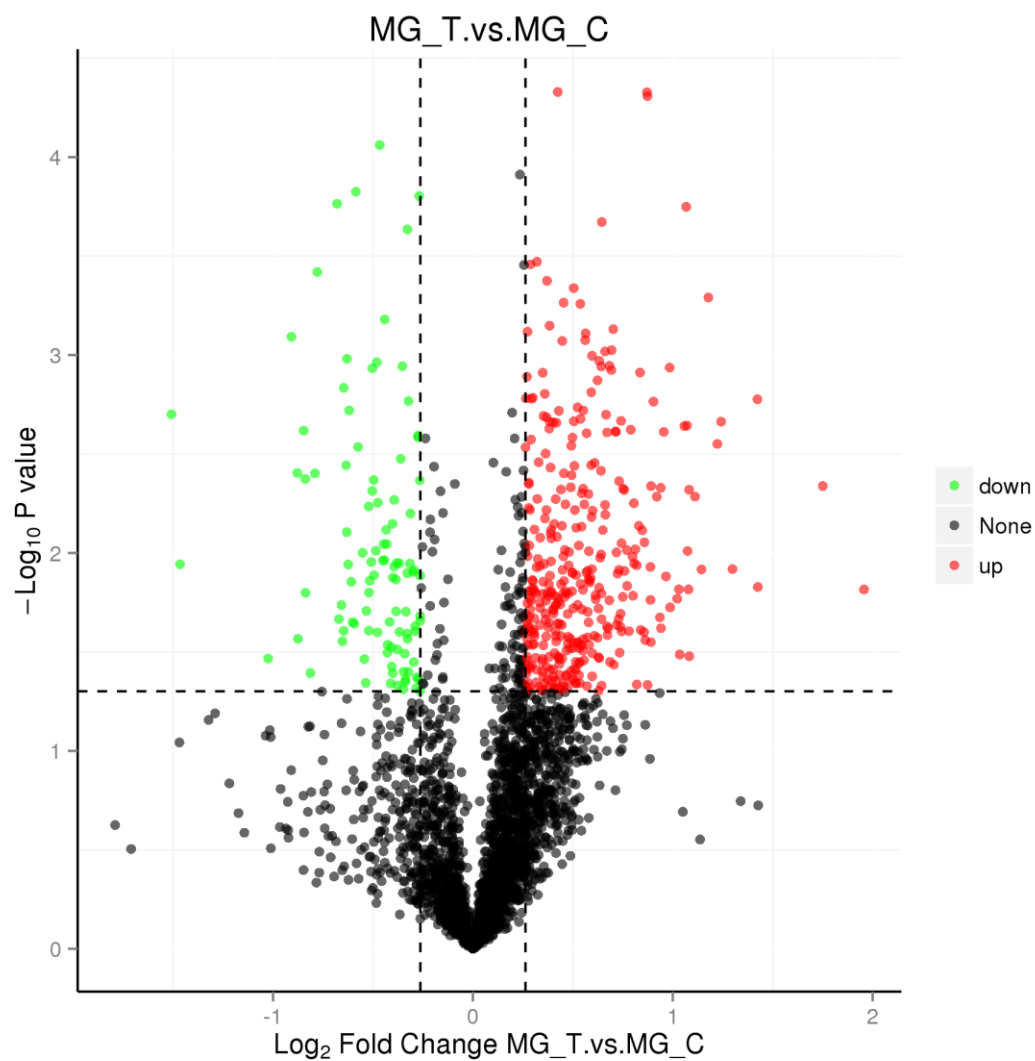

**Figure S5.** Volcano map of the DEPs

Note: The abscissa represents the fold change of protein expression in different experimental groups, and the ordinate represents the statistical significance of protein expression changes. Each point in the figure represents each protein, and the red and green points represent significantly up-regulated and down-regulated proteins.

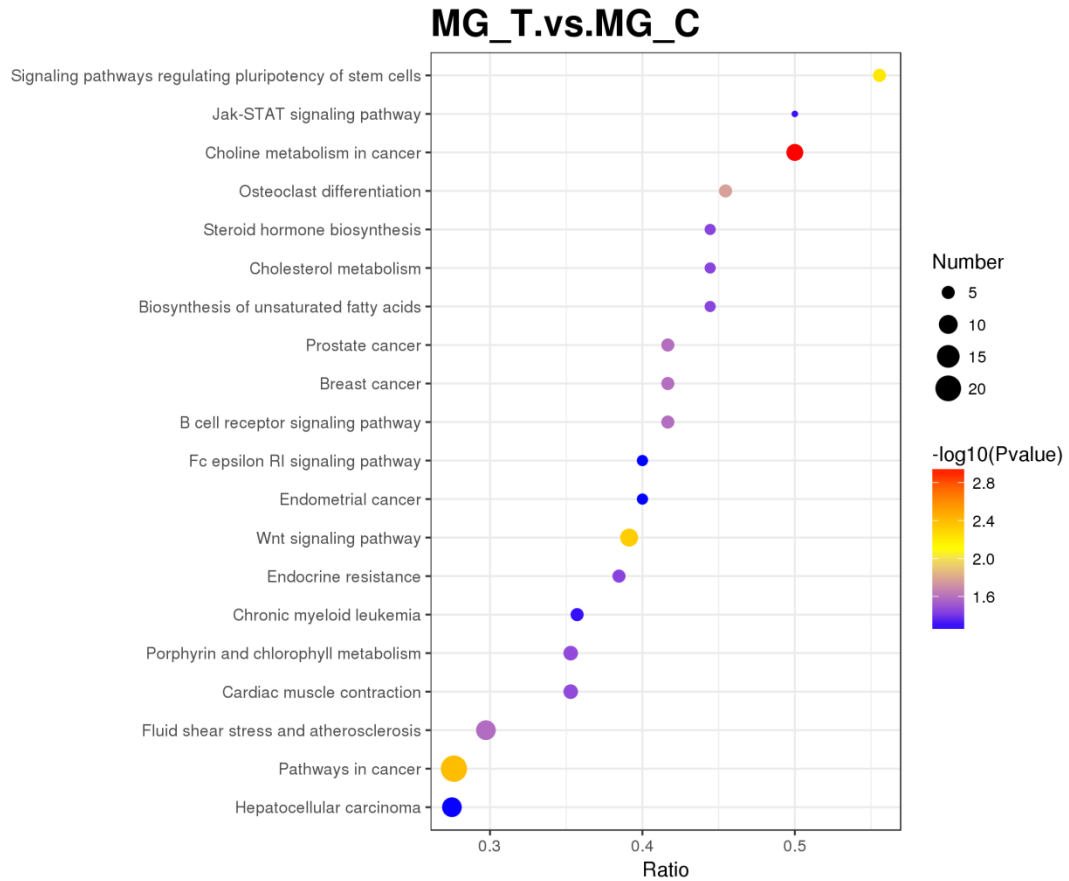

**Figure S 6.** Scatter plot of DEPs' KEGG pathway analysis

Note: The abscissa in the figure is the ratio of the number of differential proteins in the corresponding pathway to the total number of proteins identified in the pathway. The larger the value, the enrichment of differential proteins in the pathway is higher. The color of the point represents the P-value of the hypergeometric test. The size of the dot represents the number of differential proteins in the corresponding pathway.

**Table S1** 10 Primer sequences of DEGs for qRT-PCR verification

| Genes name                   |   | Primer sequence (5'-3') |
|------------------------------|---|-------------------------|
| <i>evm.TU.Hic_asm_6.736</i>  | F | ACCGAGCGAATATAATGTTG    |
|                              | R | TGTCTGAGCCATCTACGA      |
| <i>evm.TU.Hic_asm_7.386</i>  | F | GATGCCGTCAAGGTGTATA     |
|                              | R | TAGTGGTCGCTGCTACAT      |
| <i>evm.TU.Hic_asm_9.807</i>  | F | AGACGGTGATACGGTGAA      |
|                              | R | CCATCGGCATCCTTACTG      |
| <i>evm.TU.Hic_asm_5.865</i>  | F | GAGAGGCTACCGTTCAAG      |
|                              | R | TTCCATACCAGCGATGATC     |
| <i>evm.TU.Hic_asm_9.444</i>  | F | TCTCGCTTCACATCTCATC     |
|                              | R | GCCTGACTAGAACGCATT      |
| <i>evm.TU.Hic_asm_4.422</i>  | F | CGTATCGCTCCTCAATGTT     |
|                              | R | CCTGTAATCCTTCGTGGTAA    |
| <i>evm.TU.Hic_asm_6.129</i>  | F | ACACCAGCACAGTTACATAA    |
|                              | R | CGCCTTCCATTAGACTCTC     |
| <i>evm.TU.Hic_asm_9.336</i>  | F | GCGTCAGCAATCATTCCCT     |
|                              | R | CCGAGAAGCAGCAGAATT      |
| <i>evm.TU.Hic_asm_11.708</i> | F | GCTGAACGCTGAAGAGTTCG    |
|                              | R | GAACGAGACCGCTTGATTTC    |
| <i>evm.TU.Hic_asm_2.621</i>  | F | TCTCGTATTAACGCACTGA     |
|                              | R | GACTCATCCTCCATTCCCTTA   |

**Table S2** 7 Primer sequences of DEGs for qRT-PCR verification

| Genes name                   |   | Primer sequence (5'-3') |
|------------------------------|---|-------------------------|
| <i>evm.TU.Hic_asm_3.922</i>  | F | GCTGGGAAGTGAAGGAATTGT   |
|                              | R | TAACGCAGAAGACGGTCAAG    |
| <i>evm.TU.Hic_asm_3.207</i>  | F | GATGCCGACATTGAACTTGA    |
|                              | R | TGCTTCCGATATGTTGTATGG   |
| <i>evm.TU.Hic_asm_3.1077</i> | F | CGGAACAAGATGGCACTTC     |
|                              | R | CATTGCTTCGTAGGATTCGTA   |
| <i>evm.TU.Hic_asm_13.549</i> | F | CGCACGACGATACGATACTC    |
|                              | R | AGCGGTAGAGTCTCATTGTG    |
| <i>evm.TU.Hic_asm_11.737</i> | F | CACTGGTCTGGTTGGTACTC    |
|                              | R | TTGGCTCGGATCTCAATACG    |
| <i>evm.TU.Hic_asm_5.10</i>   | F | ACGCTATGCCAGATTACACT    |
|                              | R | CACGACTCCACATAACTCAC    |
| <i>evm.TU.Hic_asm_5.109</i>  | F | GGCAGGTTAGTCTATGTGAA    |
|                              | R | TGGTCCATTCTAGGAAGTCT    |



**Table S3. Transcriptome and proteome GO enrichment DEGs/DEPs statistics table**

|                          |                    | Prot-go | Tran-go | Total |
|--------------------------|--------------------|---------|---------|-------|
| DEGs/DEPs                |                    | 434     | 2535    | 2969  |
| Annotated Genes/ protein |                    | 290     | 581     | 871   |
| GO term                  | Biological Process | 151     | 405     | 556   |
|                          | Cellular Component | 106     | 196     | 302   |
|                          | Molecular Function | 219     | 313     | 532   |
|                          | Total              | 476     | 914     | 1390  |
